# Supplementary material for: Topographical Response of Retinal Neovascularization to Aflibercept or Panretinal Photocoagulation in Proliferative Diabetic Retinopathy: Post Hoc Analysis of the CLARITY Randomized Clinical Trial
Source: PubMed Central journal article supplement (PMC7953330; doi:10.1001/jamaophthalmol.2021.0108), 2021-03-11
Supplement: jamaophthalmol-e210108-s001.pdf [file jamaophthalmol-e210108-s001.pdf]

## Supplementary Online Content

Halim S, Nugawela M, Chakravarthy U, et al. Topographical response of retinal neovascularization to aflibercept or panretinal photocoagulation in proliferative diabetic retinopathy: post hoc analysis of the CLARITY randomized clinical trial. *JAMA Ophthalmol*. Published online March 11, 2021. doi:10.1001/jamaophthalmol.2021.0108

**eTable 1.** Numbers of Eyes Which Received 7-Field Imaging vs UWF Imaging

**eTable 2.** Definition of Regression Patterns

This supplementary material has been provided by the authors to give readers additional information about their work.

**eTable 1.** Numbers of Eyes Which Received 7-Field Imaging vs UWF Imaging

| Imaging modality  | Treatment |             |       |
|-------------------|-----------|-------------|-------|
|                   | PRP       | aflibercept | Total |
| Non-optos 7 field | 26        | 25          | 51    |
| Optos wide field  | 35        | 34          | 69    |
| Total             | 61        | 59          | 120   |

**eTable 2.** Definition of Regression Patterns

| Regression pattern | Definitions of regression patterns                                                                                         |
|--------------------|----------------------------------------------------------------------------------------------------------------------------|
| Regression         | Any one or more of the following:                                                                                          |
|                    | A. Complete regression of NVE/D<br>B. Persistent active NV but a decrease in size or density of NV from the previous visit |
| Persistence        | No decrease in size or density of active NV                                                                                |
| De novo occurrence | De novo active NV (flat or elevated) where previously there was none                                                       |
| Recurrence         | Recurrence can occur at any visit from week 12 and is defined as one or more of the following:                             |
|                    | A. Recurrence / reactivation of NV<br>B. De novo NV (flat or elevated) following at least 8 weeks of complete regression   |
